# Supplementary material for: Complex aneuploidy triggers autophagy and p53-mediated apoptosis and impairs the second lineage segregation in human preimplantation embryos
Source: eLife. 2024 Dec 9;12:RP88916. doi: 10.7554/eLife.88916 (PMC11627504; doi:10.7554/eLife.88916)
Supplement: Figure 4—source data 1. [file elife-88916-fig4-data1.xlsx]

## Sheet: Fig. 4b
Source Data Fig. 4b (NANOG, experiment3)
NANOG/DAPI enrichment
Euploid_TE	Aneuploid_TE	Aneuploid_ICM	Euploid_ICM
0.31	0.43	1.27	1.57
0.34	0.33	0.68	1.45
0.16	0.26	1.58	1.02
0.38	0.53	1.89	1.27
0.16	0.53	1.39	1.67
0.21	0.61	3.26	0.79
0.34	0.45	4.75	1.91
	0.59	2.08
	0.53	3.45
	0.61	2.73

## Sheet: Fig. 4d
Source Data Figure 4d
Embryo ID	Experiment	Diagnosis	Number of TE cells
Euploid_1	4	Euploid	151
Euploid_2	4	Euploid	111
Euploid_3	4	Euploid	75
Euploid_4	4	Euploid	73
Euploid_5	4	Euploid	159
Euploid_6	4	Euploid	180
Euploid_7	4	Euploid	134
Euploid_8	4	Euploid	80
Euploid_9	4	Euploid	131
Euploid_10	4	Euploid	113
Euploid_11	4	Euploid	101
Euploid_12	4	Euploid	137
Euploid_13	4	Euploid	148
Euploid_14	4	Euploid	239
Euploid_15	4	Euploid	182
Euploid_16	4	Euploid	114
Aneuploid_1	4	M18, T1, T20	73
Aneuploid_2	4	T15, M19	68
Aneuploid_3	4	T16, M21	63
Aneuploid_4	4	T5, T22	62
Aneuploid_5	4	M14	84
Aneuploid_6	4	T14, T22	83
Aneuploid_7	4	T1,T18, Mosaic del 6q16.1-q16.2(5Mb)	105
Aneuploid_8	4	T13,T15, Moaic del 1 pter-1q34.2 (42Mb)	118
Aneuploid_9	4	T21, T13	99
Aneuploid_10	4	M16,17,18	37
Aneuploid_11	4	M5, M12, M21 and T7	117
Aneuploid_12	4	M14, T9	70
Aneuploid_13	4	T14, T16	97
Aneuploid_14	4	Triploid, +18	49
Aneuploid_15	4	T13;T15	109
Aneuploid_16	4	T9;M22	155
Aneuploid_17	4	T13;T20	62
Aneuploid_18	4	M15, T18; T19	83

## Sheet: Fig. 4e
Source Data Figure 4e
Embryo ID	Experiment	Diagnosis	ICM/EPI_number_of_nuclei
Euploid_1	4	Euploid	20
Euploid_2	4	Euploid	11
Euploid_3	4	Euploid	15
Euploid_4	4	Euploid	18
Euploid_5	4	Euploid	32
Euploid_6	4	Euploid	20
Euploid_7	4	Euploid	16
Euploid_8	4	Euploid	15
Euploid_9	4	Euploid	22
Euploid_10	4	Euploid	10
Euploid_11	4	Euploid	11
Euploid_12	4	Euploid	8
Euploid_13	4	Euploid	14
Euploid_14	4	Euploid	9
Euploid_15	4	Euploid	6
Euploid_16	4	Euploid	8
Aneuploid_1	4	M18, T1, T20	22
Aneuploid_2	4	T15, M19	3
Aneuploid_3	4	T16, M21	16
Aneuploid_4	4	T5, T22	20
Aneuploid_5	4	M14	19
Aneuploid_6	4	T14, T22	0
Aneuploid_7	4	T1,T18, Mosaic del 6q16.1-q16.2(5Mb)	19
Aneuploid_8	4	T13,T15, Moaic del 1 pter-1q34.2 (42Mb)	17
Aneuploid_9	4	T21, T13	6
Aneuploid_10	4	M16,17,18	2
Aneuploid_11	4	M5, M12, M21 and T7	5
Aneuploid_12	4	M14, T9	7
Aneuploid_13	4	T14, T16	22
Aneuploid_14	4	Triploid, +18	0
Aneuploid_15	4	T13;T15	11
Aneuploid_16	4	T9;M22	13
Aneuploid_17	4	T13;T20	5
Aneuploid_18	4	M15, T18; T19	0

## Sheet: Fig. 4f
Source Data Figure 4f
Embryo ID	Experiment	Diagnosis	Total_number_of_nuclei
Euploid_1	4	Euploid	171
Euploid_2	4	Euploid	122
Euploid_3	4	Euploid	90
Euploid_4	4	Euploid	91
Euploid_5	4	Euploid	191
Euploid_6	4	Euploid	200
Euploid_7	4	Euploid	150
Euploid_8	4	Euploid	95
Euploid_9	4	Euploid	153
Euploid_10	4	Euploid	123
Euploid_11	4	Euploid	128
Euploid_12	4	Euploid	152
Euploid_13	4	Euploid	171
Euploid_14	4	Euploid	266
Euploid_15	4	Euploid	199
Euploid_16	4	Euploid	126
Aneuploid_1	4	M18, T1, T20	95
Aneuploid_2	4	T15, M19	71
Aneuploid_3	4	T16, M21	79
Aneuploid_4	4	T5, T22	82
Aneuploid_5	4	M14	103
Aneuploid_6	4	T14, T22	83
Aneuploid_7	4	T1,T18, Mosaic del 6q16.1-q16.2(5Mb)	124
Aneuploid_8	4	T13,T15, Moaic del 1 pter-1q34.2 (42Mb)	135
Aneuploid_9	4	T21, T13	105
Aneuploid_10	4	M16,17,18	39
Aneuploid_11	4	M5, M12, M21 and T7	122
Aneuploid_12	4	M14, T9	77
Aneuploid_13	4	T14, T16	119
Aneuploid_14	4	Triploid, +18	49
Aneuploid_15	4	T13;T15	126
Aneuploid_16	4	T9;M22	172
Aneuploid_17	4	T13;T20	71
Aneuploid_18	4	M15, T18; T19	84

## Sheet: Fig. 4h
Source Data Figure 4h
Embryo_ID	Experiment	Diagnosis	Number of nuclear CASP3/7 positive cells	Number of TE cells	TE_percentage_of_CASP3_positive_cells
Euploid_1	4	Euploid	2	151	1.17
Euploid_2	4	Euploid	7	111	5.74
Euploid_3	4	Euploid	3	75	3.33
Euploid_4	4	Euploid	1	73	1.1
Euploid_5	4	Euploid	0	159	0
Euploid_6	4	Euploid	9	180	4.5
Euploid_7	4	Euploid	Excluded due to background	134	Excluded due to background
Euploid_8	4	Euploid	2	80	2.11
Euploid_9	4	Euploid	8	131	5.23
Euploid_10	4	Euploid	4	113	3.25
Aneuploid_1	4	M18, T1, T20	1	73	1.1
Aneuploid_2	4	T15, M19	7	68	9.9
Aneuploid_3	4	T16, M21	6	63	7.6
Aneuploid_4	4	T5, T22	2	62	2.4
Aneuploid_5	4	M14	7	84	6.8
Aneuploid_6	4	T14, T22	2	83	2.41
Aneuploid_7	4	T1,T18, Mosaic del 6q16.1-q16.2(5Mb)	2	105	1.61
Aneuploid_8	4	T13,T15, Moaic del 1 pter-1q34.2 (42Mb)	5	118	3.7
Aneuploid_9	4	T21, T13	8	99	7.62
Aneuploid_10	4	M16,17,18	5	37	12.82
Aneuploid_11	4	M5, M12, M21 and T7	24	117	19.67
Aneuploid_12	4	M14, T9	2	70	2.6
Aneuploid_13	4	T14, T16	2	97	1.68
Aneuploid_14	4	Triploid, +18	4	49	8.16

## Sheet: Fig. 4i
Source Data Figure 4i
Embryo_ID	Experiment	Diagnosis	Mean intensity of CASP3/7 whole embryo	Number of total cells	Whole_embryo_CASP3_mean_intesity_per_cell
Euploid_1	4	Euploid	15885	171	92.8947
Euploid_2	4	Euploid	19107	122	156.615
Euploid_3	4	Euploid	13125	90	145.833
Euploid_4	4	Euploid	16087	91	176.78
Euploid_5	4	Euploid	11658	191	61.0366
Euploid_6	4	Euploid	12575	200	62.875
Euploid_7	4	Euploid	Excluded due to background	150	Excluded due to background
Euploid_8	4	Euploid	15491	95	163.063
Euploid_9	4	Euploid	14012	153	91.5817
Euploid_10	4	Euploid	20550	123	167.073
Aneuploid_1	4	M18, T1, T20	16984	95	178.779
Aneuploid_2	4	T15, M19	11803	71	166.239
Aneuploid_3	4	T16, M21	22009	79	278.595
Aneuploid_4	4	T5, T22	12620	82	153.902
Aneuploid_5	4	M14	19780	103	192.039
Aneuploid_6	4	T14, T22	13726	83	165.373
Aneuploid_7	4	T1,T18, Mosaic del 6q16.1-q16.2(5Mb)	15567	124	125.54
Aneuploid_8	4	T13,T15, Moaic del 1 pter-1q34.2 (42Mb)	12267	135	90.8667
Aneuploid_9	4	T21, T13	11491	105	109.438
Aneuploid_10	4	M16,17,18	19020	39	487.692
Aneuploid_11	4	M5, M12, M21 and T7	18753	122	153.713
Aneuploid_12	4	M14, T9	12964	77	168.364
Aneuploid_13	4	T14, T16	18706	119	157.193
Aneuploid_14	4	Triploid, +18	17928	49	365.878

## Sheet: Fig. 4k
Source Data Figure 4k
Embryo_ID	Experiment	Diagnosis	Total number of DAPI/CASP3 positive micronuclei	Total number of cells	Whole_embryo_micronuclei _per_cell
Euploid_1	4	Euploid	4	171	0.0233918
Euploid_2	4	Euploid	20	122	0.163934
Euploid_3	4	Euploid	2	90	0.0222222
Euploid_4	4	Euploid	13	91	0.142857
Euploid_5	4	Euploid	6	191	0.0314136
Euploid_6	4	Euploid	23	200	0.115
Euploid_7	4	Euploid	Excluded due to background	150	Excluded due to background
Euploid_8	4	Euploid	31	95	0.326316
Euploid_9	4	Euploid	7	153	0.0457516
Euploid_10	4	Euploid	9	123	0.0731707
Aneuploid_1	4	M18, T1, T20	11	95	0.115789
Aneuploid_2	4	T15, M19	31	71	0.43662
Aneuploid_3	4	T16, M21	11	79	0.139241
Aneuploid_4	4	T5, T22	12	82	0.146341
Aneuploid_5	4	M14	61	103	0.592233
Aneuploid_6	4	T14, T22	22	83	0.26506
Aneuploid_7	4	T1,T18, Mosaic del 6q16.1-q16.2(5Mb)	9	124	0.0725806
Aneuploid_8	4	T13,T15, Moaic del 1 pter-1q34.2 (42Mb)	34	135	0.251852
Aneuploid_9	4	T21, T13	28	105	0.266667
Aneuploid_10	4	M16,17,18	7	39	0.179487
Aneuploid_11	4	M5, M12, M21 and T7	30	122	0.245902
Aneuploid_12	4	M14, T9	29	77	0.376623
Aneuploid_13	4	T14, T16	28	119	0.235294
Aneuploid_14	4	Triploid, +18	5	49	0.102041

## Sheet: Fig. 4m
Source Data Figure 4m
Embryo_ID	Experiment	Diagnosis	Total LC3B puncta	Total number of cells	Whole _embryo_LC3B_puncta_per_cell
Euploid_1	4	Euploid	601	171	3.51462
Euploid_2	4	Euploid	261	122	2.13934
Euploid_3	4	Euploid	60	90	0.666667
Euploid_4	4	Euploid	209	91	2.2967
Euploid_11	4	Euploid	227	128	1.77
Euploid_12	4	Euploid	181	152	1.19
Euploid_13	4	Euploid	988	171	5.77
Euploid_14	4	Euploid	713	266	2.68
Euploid_15	4	Euploid	1818	199	9.13
Euploid_16	4	Euploid	1040	126	8.25
Aneuploid_1	4	M18, T1, T20	1867	95	19.6526
Aneuploid_2	4	T15, M19	288	71	4.05634
Aneuploid_3	4	T16, M21	246	79	3.11392
Aneuploid_4	4	T5, T22	1227	82	14.9634
Aneuploid_5	4	M14	1382	103	13.4175
Aneuploid_15	4	T13;T15	592	126	4.69
Aneuploid_16	4	T9;M22	623	172	3.62
Aneuploid_17	4	T13;T20	598	71	8.42
Aneuploid_18	4	M15, T18; T19	460	84	5.47

## Sheet: Fig. 4n
Source Data Figure 4n
Embryo_ID	Experiment	Diagnosis	Number of LC3B puncta in TE	Number of TE cells	TE_LC3B_puncta_per_cell
Euploid_1	4	Euploid	534	151	3.53642
Euploid_2	4	Euploid	242	111	2.18018
Euploid_3	4	Euploid	60	75	0.8
Euploid_4	4	Euploid	189	73	2.58904
Euploid_11	4	Euploid	161	101	1.59
Euploid_12	4	Euploid	168	137	1.22
Euploid_13	4	Euploid	871	148	5.88
Euploid_14	4	Euploid	685	239	2.86
Euploid_15	4	Euploid	1662	182	9.13
Euploid_16	4	Euploid	1030	114	9.03
Aneuploid_1	4	M18, T1, T20	1846	73	25.2877
Aneuploid_2	4	T15, M19	271	68	3.98529
Aneuploid_3	4	T16, M21	212	63	3.36508
Aneuploid_4	4	T5, T22	753	62	12.1452
Aneuploid_5	4	M14	980	84	11.6667
Aneuploid_15	4	T13;T15	541	109	4.96
Aneuploid_16	4	T9;M22	609	155	3.92
Aneuploid_17	4	T13;T20	610	62	9.45
Aneuploid_18	4	M15, T18; T19	460	83	5.54

## Sheet: Fig. 4o
Source Data Figure 4o
Embryo_ID	Experiment	Diagnosis	Number of LC3B puncta in ICM	Number of ICM cells	ICM_LC3B_puncta_per_cell
Euploid_1	4	Euploid	67	20	3.35
Euploid_2	4	Euploid	19	11	1.72727
Euploid_3	4	Euploid	0	15	0
Euploid_4	4	Euploid	20	18	1.11111
Euploid_11	4	Euploid	66	11	2.44
Euploid_12	4	Euploid	13	8	0.86
Euploid_13	4	Euploid	117	14	5.08
Euploid_14	4	Euploid	28	9	1.03
Euploid_15	4	Euploid	156	6	9.17
Euploid_16	4	Euploid	10	8	0.83
Aneuploid_1	4	M18, T1, T20	21	22	0.954545
Aneuploid_2	4	T15, M19	17	3	5.66667
Aneuploid_3	4	T16, M21	34	16	2.125
Aneuploid_4	4	T5, T22	474	20	23.7
Aneuploid_5	4	M14	402	19	21.1579
Aneuploid_15	4	T13;T15	51	11	3
Aneuploid_16	4	T9;M22	14	13	0.82
Aneuploid_17	4	T13;T20	12	5	1.33
Aneuploid_18	4	M15, T18; T19	0	0	0

[truncated: 3 more sheets: Fig. 4q, Fig. 4r, Fig. 4s]
