# Supplementary material for: Complex aneuploidy triggers autophagy and p53-mediated apoptosis and impairs the second lineage segregation in human preimplantation embryos
Source: eLife. 2024 Dec 9;12:RP88916. doi: 10.7554/eLife.88916 (PMC11627504; doi:10.7554/eLife.88916)
Supplement: Supplementary file 1. [file elife-88916-supp1.xlsx]

## Sheet: Tabelle1
Supplementary Table 1. PGT diagnoses and inferCNV results first experiment
ID	Diagnosis	Technique	Days post-fertilization	Stage	Score	Group	InferCNV result	Infer CNV missed call	Infer CNV confims PGT	RNA-seq	Immunostaining	Biopsy
Aneuploid_1	trisomy 5,monosomy 14 and 19 (all maternal)	SNP	6	BL4	CA	Aneuploid	trisomy 5,monosomy 14 and 19	/	Yes	Yes	Yes	Yes
Aneuploid_2	trisomy 9, monosomy 22, deletion 10p11.1 to 10pter (~39Mb). XY	NGS	6	BL7	BA	Aneuploid	trisomy 9, monosomy 22	/	Yes	Yes	Yes	Yes
Aneuploid_3	monosomy 14 and 19, trisomy 16. XY	NGS	6	BL7	BB	Aneuploid	monosomy 14 and 19, trisomy 16	/	Yes	Yes	Yes	Yes
Aneuploid_4	monosomy 17 (pat), duplication 6q21 to 6ter (~64Mb, mat), deletion Xq27.3 to Xqter (~11Mb, mat), XX.	SNP	5	BL5	BB	Aneuploid	monosomy 17	/	Yes	Yes	Yes	Yes
Aneuploid_5	monosomy 14 and 21. XY	SNP	5	BL7	AB	Aneuploid	monosomy 14 and 21.	/	Yes	Yes	Yes	Yes
Aneuploid_6	monosomy 2, monosomy 19, XY	NGS	6	BL7	BA	Aneuploid	monosomy 2, monosomy 19	/	Yes	Yes	Yes	Yes
Aneuploid_7	monosomy 5, trisomy 9, monosomy 21. XY	NGS	6	BL7	BA	Aneuploid	monosomy 5, trisomy 9, monosomy 21	/	Yes	Yes	No	Yes
Aneuploid_8	Difficult to assign copy number -> 'Combined abnormal' ?	NGS	6	BL7	AB	Aneuploid	EXCLUDED	EXCLUDED	EXCLUDED	Yes	Yes	Yes
Aneuploid_9	trisomy 1, 15, 18 and 22 (all 4 confirmed maternal meiotic), mosaic monosomy 7. XX	SNP	5	BL7	AB	Aneuploid	trisomy 1, 15, 18, 22	/	Yes	Yes	No	Yes
Aneuploid_10	trisomy 15 and 22, monosomy 18. XX	NGS	5	BL7	AC	Aneuploid	Monosomy 18	T15, T22	No	Yes	Yes	Yes
Aneuploid_11	trisomy 10 and 22. XX	NGS	6	BL7	BA	Aneuploid	trisomy 10 and 22	/	Yes	Yes	Yes	Yes
Aneuploid_12	trisomy 17, monosomy 18, 19 and 21. XY	NGS	6	BL7	BB	Aneuploid	trisomy 17, monosomy 18, 19 and 21	/	Yes	Yes	Yes	Yes
Aneuploid_13	trisomy 19, monosomy 22. XX	NGS	6	BL7	BB	Aneuploid	trisomy 19, monosomy 22	/	Yes	Yes	No	Yes
Aneuploid_14	monosomy 13, trisomy 22. XY	NGS	6	BL7	BB	Aneuploid	monosomy 13, trisomy 22	/	Yes	Yes	Yes	Yes
Aneuploid_15	monosomy 14, 21 and 22, trisomy 18, mosaic deletion 12q24.23 to 12qter (~15Mb). XX	NGS	5	BL7	AB	Aneuploid	monosomy 14, 21 and 22, trisomy 18	/	Yes	Yes	Yes	Yes
Aneuploid_16	trisomy 7, monosomy 11, dup16p12.3 to 16qter (~69Mb). XY	NGS	5	BL7	BB	Aneuploid	trisomy 7, monosomy 11	/	Yes	Yes	Yes	Yes
Aneuploid_17	trisomy 18, monosomy 22, mosaic monosomy chr5, mosaic monosomy 21. XX	NGS	5	BL3	BB	Aneuploid	monosomy 22	trisomy 18	No	Yes	Yes	Yes
Aneuploid_18	trisomy 2, trisomy 10, mos. Del 17p11.2 to 17pter ~18Mb). XX	NGS	5	BL7	BB	Aneuploid	trisomy 2, trisomy 10	/	Yes	Yes	Yes	Yes
Aneuploid_19	Trisomy 2 and 22, monosomy 13, mos trisomy 8? XY	NGS	5	BL7	BB	Aneuploid	Trisomy 2 and 22, monosomy 13	/	Yes	Yes	No	Yes
Aneuploid_20	monosomy 14 and X, mos. del 3q13.12 to 3qter (~91Mb). X	NGS	5	BL7	AB	Aneuploid	monosomy 14	/	Yes	Yes	Yes	Yes
Aneuploid_21	monosomy 11, 13, 22	NGS	5	BL3	BA	Aneuploid	NA	NA	NA	No	Yes	Yes
Aneuploid_22	Trisomy 11, 12, 17, 22 (maternal)	SNP confirmed with NGS	5	BL7	BA	Aneuploid	NA	NA	NA	No	Yes	Yes
Euploid_1	Euploid	SNP	5	BL7	AA	Euploid	Euploid	/	Yes	Yes	No	Yes
Euploid_2	Euploid	SNP	5	BL7	BB	Euploid	Euploid	/	Yes	Yes	No	Yes
Euploid_3	Euploid	SNP	5	BL6	BA	Euploid	Euploid	/	Yes	Yes	Yes	Yes
Euploid_4	Euploid	SNP	5	BL7	AB	Euploid	Euploid	/	Yes	Yes	No	Yes
Euploid_5	Euploid	SNP	5	BL7	AB	Euploid	Euploid	/	Yes	Yes	Yes	Yes
Euploid_6	Euploid	SNP	5	BL7	AB	Euploid	Euploid	/	Yes	Yes	No	Yes
Euploid_7	Euploid	SNP	5	BL7	AB	Euploid	Euploid	/	Yes	Yes	No	Yes
Euploid_8	Euploid	SNP	6	BL6	BB	Euploid	Euploid	/	Yes	Yes	No	Yes
Euploid_9	Euploid	SNP	6	BL7	BB	Euploid	Euploid	/	Yes	Yes	No	Yes
Euploid_10	Euploid	SNP	5	BL7	AC	Euploid	Euploid	/	Yes	Yes	Yes	Yes
Euploid_11	Euploid	SNP	6	BL6	BA	Euploid	Euploid	/	Yes	Yes	Yes	Yes
Euploid_12	Euploid	SNP	5	BL7	BB	Euploid	Euploid	/	Yes	Yes	No	Yes
Euploid_13	Euploid	SNP	5	BL7	BB	Euploid	Euploid	/	Yes	Yes	Yes	Yes
Euploid_14	Euploid	SNP	5	BL7	BB	Euploid	Euploid	/	Yes	Yes	No	Yes
Euploid_15	Euploid	SNP	5	BL7	AA	Euploid	NA	NA	NA	No	Yes	Yes
Euploid_16	Euploid	SNP	6	BL6	AA	Euploid	NA	NA	NA	No	Yes	Yes
Euploid_17	Euploid	SNP	5	BL7	AA	Euploid	NA	NA	NA	No	Yes	Yes
Euploid_18	Euploid	SNP	6	BL7	BA	Euploid	NA	NA	NA	No	Yes	Yes
Euploid_19	Euploid	SNP	6	BL7	BA	Euploid	NA	NA	NA	No	Yes	Yes
Euploid_20	Euploid	SNP	6	BL6	BA	Euploid	NA	NA	NA	No	Yes	Yes
Euploid_21	Euploid	SNP	6	BL7	BA	Euploid	NA	NA	NA	No	Yes	Yes
Euploid_22	Euploid	SNP	5	BL7	BA	Euploid	NA	NA	NA	No	Yes	Yes
Euploid_23	Euploid	SNP	6	BL7	AB	Euploid	NA	NA	NA	No	Yes	Yes
Euploid_24	Euploid	SNP	5	BL7	AB	Euploid	NA	NA	NA	No	Yes	Yes
Euploid_25	Euploid	SNP	5	BL7	AB	Euploid	NA	NA	NA	No	Yes	Yes
Euploid_26	Euploid	SNP	5	BL7	AA	Euploid	NA	NA	NA	No	Yes	Yes
Euploid_27	Euploid	SNP	5	BL7	AB	Euploid	NA	NA	NA	No	Yes	Yes
Euploid_28	Euploid	SNP	5	BL7	BB	Euploid	NA	NA	NA	No	Yes	Yes
Reversine_1	NA	NA	5	NA	AB	Reversine-treated	NA	NA	NA	Yes	Yes	Yes
Reversine_2	NA	NA	5	NA	AA	Reversine-treated	NA	NA	NA	Yes	Yes	Yes
Reversine_3	NA	NA	5	NA	BA	Reversine-treated	NA	NA	NA	Yes	Yes	Yes
Reversine_4	NA	NA	5	NA	BB	Reversine-treated	NA	NA	NA	Yes	Yes	Yes
Reversine_5	NA	NA	5	NA	AA	Reversine-treated	NA	NA	NA	Yes	Yes	Yes
Reversine_6	NA	NA	5	NA	AA	Reversine-treated	NA	NA	NA	Yes	No	Yes
Reversine_7	NA	NA	5	NA	AB	Reversine-treated	NA	NA	NA	Yes	No	Yes
Reversine_8	NA	NA	5	NA	AA	Reversine-treated	NA	NA	NA	Yes	Yes	Yes
Reversine_9	NA	NA	5	NA	BA	Reversine-treated	NA	NA	NA	Yes	Yes	Yes
Reversine_10	NA	NA	5	NA	AB	Reversine-treated	NA	NA	NA	Yes	Yes	Yes
Reversine_11	NA	NA	5	NA	AA	Reversine-treated	NA	NA	NA	Yes	No	Yes
