# Supplementary material for: Complex aneuploidy triggers autophagy and p53-mediated apoptosis and impairs the second lineage segregation in human preimplantation embryos
Source: eLife. 2024 Dec 9;12:RP88916. doi: 10.7554/eLife.88916 (PMC11627504; doi:10.7554/eLife.88916)
Supplement: Supplementary file 2. [file elife-88916-supp2.xlsx]

## Sheet: Tabelle1
Supplementary Table 2. Differentially expressed genes aneuploid versus euploid embryos
ENSEMBL ID	Gene symbol	log2FoldChange	FDR	Up-/downregulated
ENSG00000142552	RCN3	23.3812	1.87928e-24	UP
ENSG00000173535	TNFRSF10C	5.86246	2.58691e-05	UP
ENSG00000248429	GASK1B-AS1	7.96597	3.1417e-05	UP
ENSG00000250337	PURPL	3.9196	4.42821e-05	UP
ENSG00000225731	PDE9A-AS1	7.40661	0.000148361	UP
ENSG00000163584	RPL22L1	-1.58898	0.000279885	DOWN
ENSG00000280079	NA	-1.5454	0.000666021	DOWN
ENSG00000135679	MDM2	1.4208	0.0032117	UP
ENSG00000171552	BCL2L1	1.00103	0.0032117	UP
ENSG00000284948	LOC254896	6.38809	0.00493272	UP
ENSG00000120210	INSL6	7.17865	0.00722605	UP
ENSG00000136048	DRAM1	1.24786	0.0149205	UP
ENSG00000120889	TNFRSF10B	3.19774	0.0284178	UP
ENSG00000138028	CGREF1	4.23125	0.0284178	UP
ENSG00000166206	GABRB3	1.80566	0.0314002	UP
ENSG00000214553	LRRC37A11P	3.36704	0.0314002	UP
ENSG00000271503	CCL5	5.20668	0.0344829	UP
ENSG00000104154	SLC30A4	6.08832	0.0345371	UP
ENSG00000105963	ADAP1	6.12628	0.0384911	UP
ENSG00000179562	GCC1	1.49085	0.0417174	UP
ENSG00000145107	TM4SF19	6.46493	0.0433637	UP
ENSG00000184557	SOCS3	2.15424	0.0433637	UP
ENSG00000143194	MAEL	1.89187	0.0443362	UP
