# Supplementary material for: Complex aneuploidy triggers autophagy and p53-mediated apoptosis and impairs the second lineage segregation in human preimplantation embryos
Source: eLife. 2024 Dec 9;12:RP88916. doi: 10.7554/eLife.88916 (PMC11627504; doi:10.7554/eLife.88916)
Supplement: Supplementary file 3. [file elife-88916-supp3.xlsx]

## Sheet: Tabelle1
Supplementary Table 3. Differentially expressed genes reversine versus euploid embryos
ENSEMBL ID	Gene symbol	log2FoldChange	FDR	Up-/downregulated
ENSG00000236824	BCYRN1	-2.88477	0.00116765	DOWN
ENSG00000187840	EIF4EBP1	-1.30735	0.00196026	DOWN
ENSG00000140264	SERF2	-1.06611	0.00372662	DOWN
ENSG00000154305	MIA3	1.15576	0.00406421	UP
ENSG00000232112	TMA7	-1.08702	0.00533763	DOWN
ENSG00000243147	MRPL33	-1.06691	0.0053946	DOWN
ENSG00000112667	DNPH1	-1.46411	0.00742253	DOWN
ENSG00000105185	PDCD5	-1.09994	0.00742253	DOWN
ENSG00000088832	FKBP1A	-1.04299	0.00742253	DOWN
ENSG00000135441	BLOC1S1	-1.14164	0.00808648	DOWN
ENSG00000179218	CALR	1.05758	0.00808648	UP
ENSG00000079215	SLC1A3	1.44366	0.00808648	UP
ENSG00000159363	ATP13A2	1.54446	0.00817017	UP
ENSG00000155657	TTN	2.04234	0.00825779	UP
ENSG00000129347	KRI1	1.00339	0.0116732	UP
ENSG00000244187	TMEM141	-1.33087	0.0116927	DOWN
ENSG00000077942	FBLN1	1.54979	0.0118968	UP
ENSG00000102309	PIN4	-1.19637	0.0133636	DOWN
ENSG00000196821	ILRUN	-1.23867	0.013719	DOWN
ENSG00000196976	LAGE3	-1.22512	0.013719	DOWN
ENSG00000105887	MTPN	-1.06452	0.013719	DOWN
ENSG00000105258	POLR2I	-1.00084	0.013719	DOWN
ENSG00000130202	NECTIN2	1.02356	0.013719	UP
ENSG00000168769	TET2	1.04304	0.0144524	UP
ENSG00000103512	NOMO1	1.13663	0.0144555	UP
ENSG00000163283	ALPP	1.41753	0.0144555	UP
ENSG00000105726	ATP13A1	1.32592	0.0154923	UP
ENSG00000063241	ISOC2	-1.69017	0.0160752	DOWN
ENSG00000136068	FLNB	1.02316	0.0160752	UP
ENSG00000088836	SLC4A11	1.35689	0.0160752	UP
ENSG00000170906	NDUFA3	-1.01512	0.017434	DOWN
ENSG00000117724	CENPF	1.18704	0.018147	UP
ENSG00000157765	SLC34A2	1.44308	0.018147	UP
ENSG00000130702	LAMA5	1.12239	0.019612	UP
ENSG00000116539	ASH1L	1.31939	0.0204399	UP
ENSG00000148773	MKI67	1.20319	0.0205198	UP
ENSG00000117616	RSRP1	1.51709	0.0205981	UP
ENSG00000187446	CHP1	-1.04097	0.0254586	DOWN
ENSG00000137812	KNL1	1.09593	0.0257745	UP
ENSG00000114302	PRKAR2A	-1.02853	0.0260754	DOWN
ENSG00000196350	ZNF729	1.76514	0.0267062	UP
ENSG00000139734	DIAPH3	1.00583	0.0328002	UP
ENSG00000009413	REV3L	1.01299	0.0336986	UP
ENSG00000160124	MIX23	-1.08402	0.0347217	DOWN
ENSG00000103995	CEP152	1.21754	0.0347217	UP
ENSG00000175602	CCDC85B	-1.04355	0.0350754	DOWN
ENSG00000140564	FURIN	1.05203	0.0353755	UP
ENSG00000277196	PRODH	1.04353	0.0372464	UP
ENSG00000130695	CEP85	1.11954	0.0382505	UP
ENSG00000063761	ADCK1	1.48079	0.0397057	UP
ENSG00000103423	DNAJA3	1.00915	0.04095	UP
ENSG00000082781	ITGB5	1.1708	0.0423574	UP
ENSG00000164904	ALDH7A1	-1.1137	0.0423591	DOWN
ENSG00000101474	APMAP	1.0136	0.0473415	UP
ENSG00000174227	PIGG	1.09119	0.0482545	UP
ENSG00000183506	PI4KAP2	1.2119	0.0492723	UP
