# Supplementary material for: Complex aneuploidy triggers autophagy and p53-mediated apoptosis and impairs the second lineage segregation in human preimplantation embryos
Source: eLife. 2024 Dec 9;12:RP88916. doi: 10.7554/eLife.88916 (PMC11627504; doi:10.7554/eLife.88916)
Supplement: Supplementary file 4. [file elife-88916-supp4.xlsx]

## Sheet: Tabelle1
Supplementary Table 4. Ranks of imbalanced gene loci for the first experiment
ID	Diagnosis	Total imbalanced loci	Percent rank within group	Dosage rank within group
Aneuploid_9	trisomy 1, 15, 18 and 22 (all 4 confirmed maternal meiotic), mosaic monosomy 7. XX	5000	1.0	high
Aneuploid_12	trisomy 17, monosomy 18, 19 and 21. XY	3518	0.94	high
Aneuploid_1	trisomy 5,monosomy 14 and 19 (all maternal)	3322	0.89	high
Aneuploid_19	Trisomy 2 and 22, monosomy 13, mos trisomy 8? XY	3263	0.83	high
Aneuploid_3	monosomy 14 and 19, trisomy 16. XY	3217	0.78	high
Aneuploid_6	monosomy 2, monosomy 19, XY	3053	0.72	high
Aneuploid_16	trisomy 7, monosomy 11, dup16p12.3 to 16qter (~69Mb). XY	2762	0.67	high
Aneuploid_18	trisomy 2, trisomy 10, mos. Del 17p11.2 to 17pter ~18Mb). XX	2437	0.61	high
Aneuploid_7	monosomy 5, trisomy 9, monosomy 21. XY	2192	0.56	high
Aneuploid_17	trisomy 18, monosomy 22, mosaic monosomy chr5, mosaic monosomy 21. XX	2163	0.5	high
Aneuploid_15	monosomy 14, 21 and 22, trisomy 18, mosaic deletion 12q24.23 to 12qter (~15Mb). XX	2058	0.44	low
Aneuploid_13	trisomy 19, monosomy 22. XX	2050	0.39	low
Aneuploid_4	monosomy 17 (pat), duplication 6q21 to 6ter (~64Mb, mat), deletion Xq27.3 to Xqter (~11Mb, mat), XX.	1667	0.33	low
Aneuploid_10	trisomy 15 and 22, monosomy 18. XX	1586	0.28	low
Aneuploid_2	trisomy 9, monosomy 22, deletion 10p11.1 to 10pter (~39Mb). XY	1367	0.22	low
Aneuploid_20	monosomy 14 and X, mos. del 3q13.12 to 3qter (~91Mb). X	1361	0.17	low
Aneuploid_11	trisomy 10 and 22. XX	1353	0.11	low
Aneuploid_5	monosomy 14 and 21. XY	1066	0.06	low
Aneuploid_14	monosomy 13, trisomy 22. XY	947	0.0	low
