# Supplementary material for: Complex aneuploidy triggers autophagy and p53-mediated apoptosis and impairs the second lineage segregation in human preimplantation embryos
Source: eLife. 2024 Dec 9;12:RP88916. doi: 10.7554/eLife.88916 (PMC11627504; doi:10.7554/eLife.88916)
Supplement: Supplementary file 5. [file elife-88916-supp5.xlsx]

## Sheet: Tabelle1
Supplementary Table 5. Differentially expressed genes high-dosage versus euploid embryos
ENSEMBL ID	Gene symbol	log2FoldChange	FDR	Up-/downregulated
ENSG00000137975	CLCA2	22.4467	3.81551e-12	UP
ENSG00000248429	GASK1B-AS1	8.66135	1.11882e-06	UP
ENSG00000225731	PDE9A-AS1	7.9026	1.25461e-05	UP
ENSG00000171552	BCL2L1	1.21971	1.64774e-05	UP
ENSG00000078246	TULP3	1.42151	3.69126e-05	UP
ENSG00000173535	TNFRSF10C	6.27356	4.22092e-05	UP
ENSG00000244694	PTCHD4	7.2439	5.62027e-05	UP
ENSG00000250337	PURPL	4.10728	0.000111053	UP
ENSG00000214553	NA	4.16775	0.00029191	UP
ENSG00000077454	LRCH4	1.70076	0.000342104	UP
ENSG00000178913	TAF7	1.48905	0.000940881	UP
ENSG00000143367	TUFT1	1.18877	0.00179737	UP
ENSG00000135679	MDM2	1.57145	0.00221529	UP
ENSG00000166206	GABRB3	2.26528	0.00272476	UP
ENSG00000170836	PPM1D	1.29535	0.00383423	UP
ENSG00000136048	DRAM1	1.40555	0.00458399	UP
ENSG00000272556	NA	2.48843	0.00558463	UP
ENSG00000083307	GRHL2	1.01123	0.00563367	UP
ENSG00000173530	TNFRSF10D	6.32433	0.00605298	UP
ENSG00000064115	TM7SF3	1.62171	0.00653694	UP
ENSG00000062038	CDH3	2.36662	0.00696947	UP
ENSG00000279880	NA	3.46581	0.00759538	UP
ENSG00000154920	EME1	1.82868	0.00760661	UP
ENSG00000161513	FDXR	1.57478	0.00903918	UP
ENSG00000198223	CSF2RA	1.69221	0.00944744	UP
ENSG00000112245	PTP4A1	1.16958	0.0114394	UP
ENSG00000260019	LINC01992	7.4687	0.0119491	UP
ENSG00000134574	DDB2	2.06727	0.015733	UP
ENSG00000162086	ZNF75A	1.3009	0.0163097	UP
ENSG00000260254	NA	7.17789	0.0167865	UP
ENSG00000148219	ASTN2	1.68165	0.0168516	UP
ENSG00000177106	EPS8L2	1.58917	0.0184779	UP
ENSG00000249859	PVT1	1.36911	0.0187455	UP
ENSG00000234719	NPIPB2	3.34602	0.0191871	UP
ENSG00000113327	GABRG2	3.14668	0.0195622	UP
ENSG00000184557	SOCS3	2.32024	0.0204792	UP
ENSG00000120210	INSL6	7.42511	0.0213634	UP
ENSG00000203799	CCDC162P	5.28311	0.0218521	UP
ENSG00000154040	CABYR	3.25374	0.0223927	UP
ENSG00000225742	NA	6.81774	0.0249029	UP
ENSG00000102893	PHKB	1.0438	0.0251507	UP
ENSG00000102908	NFAT5	1.33986	0.0258227	UP
ENSG00000131558	EXOC4	1.47929	0.0263663	UP
ENSG00000196586	MYO6	1.40904	0.0264444	UP
ENSG00000048392	RRM2B	2.01956	0.0277105	UP
ENSG00000197557	IFT70A	7.20983	0.0316636	UP
ENSG00000167840	ZNF232	1.10685	0.0332089	UP
ENSG00000183734	ASCL2	5.79591	0.0332637	UP
ENSG00000241322	FBXW10B	3.90972	0.0332637	UP
ENSG00000279208	NA	2.77924	0.034427	UP
ENSG00000143393	PI4KB	1.48843	0.0354359	UP
ENSG00000237296	SMG1P1	1.46162	0.0396421	UP
ENSG00000253669	NA	5.76119	0.0417002	UP
ENSG00000090432	MUL1	1.00275	0.0440748	UP
ENSG00000101353	MROH8	3.44939	0.044799	UP
ENSG00000166546	BEAN1	6.62961	0.0460448	UP
ENSG00000138193	PLCE1	1.0258	0.0464689	UP
ENSG00000154874	NA	2.39498	0.0464689	UP
ENSG00000213225	NOC2LP1	3.32764	0.0470024	UP
ENSG00000114316	USP4	1.1758	0.0477149	UP
ENSG00000114529	C3orf52	1.17426	0.0477149	UP
ENSG00000120889	TNFRSF10B	3.18183	0.0477149	UP
ENSG00000263513	FAM72C	1.44854	0.0477149	UP
ENSG00000266173	STRADA	1.84921	0.0484579	UP
ENSG00000258738	BAZ1A-AS1	2.07336	0.0484867	UP
ENSG00000163584	RPL22L1	-2.04578	8.37426e-09	DOWN
ENSG00000261604	NA	-4.36032	1.85562e-06	DOWN
ENSG00000170889	RPS9	-1.281	8.61603e-06	DOWN
ENSG00000127540	UQCR11	-1.24287	8.64127e-06	DOWN
ENSG00000108107	RPL28	-1.47134	1.25461e-05	DOWN
ENSG00000099624	ATP5F1D	-1.34701	1.48019e-05	DOWN
ENSG00000130255	RPL36	-1.34042	3.81064e-05	DOWN
ENSG00000099795	NDUFB7	-1.27747	5.62027e-05	DOWN
ENSG00000221983	UBA52	-1.1547	7.45521e-05	DOWN
ENSG00000170906	NDUFA3	-1.49225	0.000111053	DOWN
ENSG00000063177	RPL18	-1.16776	0.000116125	DOWN
ENSG00000126247	CAPNS1	-1.75158	0.000116125	DOWN
ENSG00000070756	PABPC1	-1.37131	0.000144077	DOWN
ENSG00000115268	RPS15	-1.16031	0.000144077	DOWN
ENSG00000186010	NDUFA13	-1.31736	0.000144077	DOWN
ENSG00000183617	MRPL54	-1.1373	0.000149541	DOWN
ENSG00000233927	RPS28	-1.3998	0.000173024	DOWN
ENSG00000088247	KHSRP	-1.55685	0.00019427	DOWN
ENSG00000065978	YBX1	-1.26262	0.000248817	DOWN
ENSG00000105640	RPL18A	-1.0453	0.000248817	DOWN
ENSG00000107758	PPP3CB	-3.3332	0.000248817	DOWN
ENSG00000105258	POLR2I	-1.44259	0.000265129	DOWN
ENSG00000006015	REX1BD	-1.81407	0.000273001	DOWN
ENSG00000229833	PET100	-1.56694	0.00029191	DOWN
ENSG00000083845	RPS5	-1.03108	0.000339358	DOWN
ENSG00000104979	C19orf53	-1.08729	0.000342104	DOWN
ENSG00000142534	RPS11	-1.16645	0.000342104	DOWN
ENSG00000233762	RPS15P4	-1.36116	0.000342104	DOWN
ENSG00000126267	COX6B1	-1.02783	0.000344629	DOWN
ENSG00000105193	RPS16	-1.12081	0.000402545	DOWN
ENSG00000142541	RPL13A	-1.15531	0.000505714	DOWN
ENSG00000112667	DNPH1	-2.71272	0.000647936	DOWN
ENSG00000236824	BCYRN1	-2.94786	0.000651526	DOWN
ENSG00000099800	TIMM13	-1.09993	0.000727994	DOWN
ENSG00000183648	NDUFB1	-1.33463	0.000776976	DOWN
ENSG00000196976	LAGE3	-1.4678	0.000776976	DOWN
ENSG00000197111	PCBP2	-1.43075	0.000865957	DOWN
ENSG00000174886	NDUFA11	-1.10576	0.000877503	DOWN
ENSG00000177600	RPLP2	-1.20928	0.00113329	DOWN
ENSG00000115286	NDUFS7	-1.19424	0.00126175	DOWN
ENSG00000198258	UBL5	-1.1926	0.00126175	DOWN
ENSG00000084207	GSTP1	-1.32593	0.00129416	DOWN
ENSG00000213465	ARL2	-1.15723	0.00145556	DOWN
ENSG00000280079	NA	-1.70694	0.00158844	DOWN
ENSG00000130748	TMEM160	-1.32402	0.0016644	DOWN
ENSG00000141858	SAMD1	-1.33448	0.00178204	DOWN
ENSG00000198034	RPS4X	-1.05875	0.00178204	DOWN
ENSG00000198918	RPL39	-1.25439	0.00179737	DOWN
ENSG00000213741	RPS29	-1.22372	0.00179737	DOWN
ENSG00000179818	PCBP1-AS1	-2.89518	0.00189902	DOWN
ENSG00000174917	MICOS13	-1.37581	0.00206837	DOWN
ENSG00000175602	CCDC85B	-2.21757	0.00206837	DOWN
ENSG00000282034	NA	-1.46688	0.00236364	DOWN
ENSG00000187840	EIF4EBP1	-1.11836	0.00253844	DOWN
ENSG00000173113	TRMT112	-1.04185	0.00257029	DOWN
ENSG00000164687	FABP5	-1.1962	0.0028475	DOWN
ENSG00000241343	RPL36A	-1.1673	0.0029414	DOWN
ENSG00000105677	TMEM147	-1.19847	0.00298907	DOWN
ENSG00000172590	MRPL52	-1.09362	0.00299531	DOWN
ENSG00000275097	NA	-4.68547	0.00317906	DOWN
ENSG00000130332	LSM7	-1.29021	0.00336377	DOWN
ENSG00000183688	RFLNB	-1.57582	0.00519802	DOWN
ENSG00000063241	ISOC2	-1.98726	0.00527365	DOWN
ENSG00000240616	RPS6P25	-4.28342	0.00581003	DOWN
ENSG00000112893	MAN2A1	-1.5952	0.00586911	DOWN
ENSG00000255857	PXN-AS1	-1.47326	0.00637737	DOWN
ENSG00000269292	NA	-6.93142	0.00640175	DOWN
ENSG00000267855	NDUFA7	-1.17155	0.00645694	DOWN
ENSG00000187994	RINL	-4.53195	0.0066954	DOWN
ENSG00000116017	ARID3A	-1.72316	0.00759538	DOWN
ENSG00000160014	CALM3	-1.06248	0.00759538	DOWN
ENSG00000174599	TRAM1L1	-6.98949	0.00869732	DOWN
ENSG00000180921	FAM83H	-1.62192	0.00869732	DOWN
ENSG00000277443	MARCKS	-1.55714	0.00898679	DOWN
ENSG00000088832	FKBP1A	-1.02549	0.00903918	DOWN
ENSG00000171858	RPS21	-1.10681	0.00903918	DOWN
ENSG00000171222	SCAND1	-1.04748	0.0102714	DOWN
ENSG00000113494	PRLR	-6.8916	0.0108853	DOWN
ENSG00000165502	RPL36AL	-1.01678	0.0108853	DOWN
ENSG00000286037	NA	-1.93853	0.0108853	DOWN
ENSG00000269564	NA	-2.19868	0.0115296	DOWN
ENSG00000285600	NA	-2.07915	0.0115489	DOWN
ENSG00000124172	ATP5F1E	-1.09728	0.0125197	DOWN
ENSG00000071626	DAZAP1	-1.06163	0.0127589	DOWN
ENSG00000103653	CSK	-1.84917	0.0127589	DOWN
ENSG00000279945	NA	-1.10772	0.0132405	DOWN
ENSG00000135441	BLOC1S1	-1.25771	0.0135545	DOWN
ENSG00000144579	CTDSP1	-1.80268	0.0139908	DOWN
ENSG00000105185	PDCD5	-1.19578	0.014095	DOWN
ENSG00000034510	TMSB10	-1.39348	0.0149926	DOWN
ENSG00000146083	RNF44	-1.34414	0.0156217	DOWN
ENSG00000260482	NA	-5.9177	0.0157626	DOWN
ENSG00000112306	RPS12	-1.01575	0.0163661	DOWN
ENSG00000165644	COMTD1	-1.18875	0.0163661	DOWN
ENSG00000173674	EIF1AX	-1.00856	0.0163661	DOWN
ENSG00000163993	S100P	-2.38611	0.0167134	DOWN
ENSG00000161179	YDJC	-1.13665	0.0167865	DOWN
ENSG00000164086	DUSP7	-2.30615	0.017742	DOWN
ENSG00000169169	CPT1C	-6.52281	0.0188394	DOWN
ENSG00000232112	TMA7	-1.04992	0.0190346	DOWN
ENSG00000233012	HDAC1P2	-6.14511	0.0191871	DOWN
ENSG00000185664	PMEL	-4.14272	0.0192391	DOWN
ENSG00000167815	PRDX2	-1.15776	0.0194055	DOWN
ENSG00000002330	BAD	-1.32035	0.0195622	DOWN
ENSG00000112242	E2F3	-1.50061	0.0195622	DOWN
ENSG00000254452	NA	-2.46596	0.0195979	DOWN
ENSG00000103254	ANTKMT	-1.14916	0.0197983	DOWN
ENSG00000130749	ZC3H4	-2.15228	0.0205606	DOWN
ENSG00000267458	NA	-2.41124	0.0209367	DOWN
ENSG00000105698	USF2	-1.47092	0.0216264	DOWN
ENSG00000128602	SMO	-5.63251	0.0216304	DOWN
ENSG00000163170	BOLA3	-1.10624	0.0216616	DOWN
ENSG00000152082	MZT2B	-1.08203	0.0221375	DOWN
ENSG00000258315	C17orf49	-1.03594	0.0221493	DOWN
ENSG00000108641	B9D1	-2.00167	0.0223927	DOWN
ENSG00000245910	NA	-1.05984	0.023575	DOWN
ENSG00000189171	S100A13	-1.24877	0.0244843	DOWN
ENSG00000170142	UBE2E1	-1.54601	0.0252697	DOWN
ENSG00000227751	RCC2-AS1	-3.68921	0.0256444	DOWN
ENSG00000149115	TNKS1BP1	-1.98565	0.0256638	DOWN
ENSG00000139197	PEX5	-2.01896	0.0257257	DOWN
ENSG00000168273	UQCC5	-1.33813	0.0270906	DOWN
ENSG00000171843	MLLT3	-3.92171	0.0270906	DOWN
ENSG00000235363	NA	-1.2375	0.0270906	DOWN
ENSG00000153989	NUS1	-1.01875	0.027393	DOWN
ENSG00000213178	NA	-1.08059	0.027393	DOWN
ENSG00000130208	APOC1	-1.1521	0.0277518	DOWN
ENSG00000105254	TBCB	-1.00124	0.0281341	DOWN
ENSG00000187446	CHP1	-1.00907	0.0290738	DOWN
ENSG00000105518	TMEM205	-1.10468	0.0303923	DOWN
ENSG00000130158	DOCK6	-1.85674	0.0303923	DOWN
ENSG00000272333	KMT2B	-1.41536	0.0330317	DOWN
ENSG00000125954	CHURC1-FNTB	-1.07658	0.0332637	DOWN
ENSG00000071564	TCF3	-1.47234	0.034427	DOWN
ENSG00000048828	FAM120A	-1.0072	0.0344299	DOWN
ENSG00000166803	PCLAF	-2.0309	0.035585	DOWN
ENSG00000267436	NA	-3.74232	0.035585	DOWN
ENSG00000145860	RNF145	-1.45941	0.0375502	DOWN
ENSG00000227615	NA	-1.05408	0.0375502	DOWN
ENSG00000163453	IGFBP7	-2.93282	0.0382986	DOWN
ENSG00000197483	ZNF628	-2.59474	0.0382986	DOWN
ENSG00000264501	RN7SL731P	-5.78517	0.0382986	DOWN
ENSG00000179094	PER1	-3.62055	0.038816	DOWN
ENSG00000258430	NA	-2.45998	0.0391806	DOWN
ENSG00000125356	NDUFA1	-1.01906	0.0412975	DOWN
ENSG00000173221	GLRX	-3.31458	0.0412975	DOWN
ENSG00000236498	NA	-1.3641	0.043118	DOWN
ENSG00000204220	PFDN6	-1.08243	0.0435566	DOWN
ENSG00000133937	GSC	-5.07578	0.044799	DOWN
ENSG00000156030	MIDEAS	-1.16565	0.044799	DOWN
ENSG00000213145	CRIP1	-1.0481	0.044799	DOWN
ENSG00000091986	CCDC80	-4.58148	0.0449243	DOWN
ENSG00000143507	DUSP10	-6.3327	0.045135	DOWN
