# Supplementary material for: Complex aneuploidy triggers autophagy and p53-mediated apoptosis and impairs the second lineage segregation in human preimplantation embryos
Source: eLife. 2024 Dec 9;12:RP88916. doi: 10.7554/eLife.88916 (PMC11627504; doi:10.7554/eLife.88916)
Supplement: Supplementary file 6. [file elife-88916-supp6.xlsx]

## Sheet: Tabelle1
Embryo	Experiment	Stage at cryopreservation	Score at cryopreservation	Day at cryopreservation	Diagnosis	Dosage	Total imbalanced loci	Percent rank within group
Untreated_1	2	BL4	AB	5	NA	NA	NA	NA
Untreated_2	2	BL3	BA	5	NA	NA	NA	NA
Untreated_3	2	BL4	AA	5	NA	NA	NA	NA
Untreated_4	2	BL4	BA	5	NA	NA	NA	NA
Untreated_5	2	BL3	AB	5	NA	NA	NA	NA
Untreated_6	2	BL3	AA	5	NA	NA	NA	NA
Bleomycin_1	2	BL4	AA	5	NA	NA	NA	NA
Bleomycin_2	2	BL3	AB	5	NA	NA	NA	NA
Bleomycin_3	2	BL3	BA	5	NA	NA	NA	NA
Bleomycin_4	2	BL4	BA	5	NA	NA	NA	NA
Bleomycin_5	2	BL4	AA	5	NA	NA	NA	NA
Bleomycin_6	2	BL3	AA	5	NA	NA	NA	NA
Aneuploid_1	3	BL7	AB	5	T16, T19	high	2462	0.9
Aneuploid_2	3	BL7	AB	5	M16, M22	low	1406	0.3
Aneuploid_3	3	BL7	BB	5	M13, T15	low	1198	0.1
Aneuploid_4	3	BL7	AB	5	M22, T16, T19	high	2959	1
Aneuploid_5	3	BL7	BB	5	M18, M22	low	838	0
Aneuploid_6	3	BL7	BB	5	M4, M22	low	1341	0.2
Aneuploid_7	3	BL4	AB	5	M11, M22	high	1947	0.7
Aneuploid_8	3	BL7	BB	5	T12, T13	low	1586	0.4
Aneuploid_9	3	BL7	BB	5	M2, M15	high	2248	0.8
Aneuploid_10	3	BL7	AB	5	T9, T16	high	1776	0.6
Aneuploid_11	3	BL7	BB	5	T17, T18	high	1654	0.5
Euploid_1	3	BL7	AA	5	Euploid	Euploid	NA	NA
Euploid_2	3	BL7	AB	5	Euploid	Euploid	NA	NA
Euploid_3	3	BL6	AA	6	Euploid	Euploid	NA	NA
Euploid_4	3	BL7	AB	5	Euploid	Euploid	NA	NA
Euploid_5	3	BL6	AB	6	Euploid	Euploid	NA	NA
Euploid_6	3	BL7	AB	5	Euploid	Euploid	NA	NA
Euploid_7	3	BL7	BA	5	Euploid	Euploid	NA	NA
