# Supplementary material for: Complex aneuploidy triggers autophagy and p53-mediated apoptosis and impairs the second lineage segregation in human preimplantation embryos
Source: eLife. 2024 Dec 9;12:RP88916. doi: 10.7554/eLife.88916 (PMC11627504; doi:10.7554/eLife.88916)
Supplement: Supplementary file 7. [file elife-88916-supp7.xlsx]

## Sheet: Tabelle1
Supplementary Table 7. PGT diagnoses experiment 4
Embryo	Stage at cryopreservation	Score at cryopreservation	Day at cryopreservation	Stage at 5dpf	Diagnosis	Group	OCT4- cells	OCT4+/GATA4- cells	OCT4+/GATA4+ cells	OCT4-/GATA4+ cells
Euploid_1	BL7	BA	5	/	Euploid	Euploid	151	9	11	0
Euploid_2	BL7	BA	6	BL2	Euploid	Euploid	111	8	3	0
Euploid_3	BL6	AA	6	BL7/CC	Euploid	Euploid	75	12	3	0
Euploid_4	BL8	AB	6	BL1	Euploid	Euploid	73	9	9	0
Euploid_5	BL7	AA	5	/	Euploid	Euploid	159	18	14	0
Euploid_6	BL7	AA	5	/	Euploid	Euploid	180	lost during re-staining	lost during re-staining	0
Euploid_7	BL7	BA	5	/	Euploid	Euploid	134	10	6	0
Euploid_8	BL7	AB	5	/	Euploid	Euploid	80	9	6	0
Euploid_9	BL7	BB	5	/	Euploid	Euploid	131	12	10	0
Euploid_10	BL7	AB	6	BL1	Euploid	Euploid	113	6	4	0
Euploid_11	BL7	AB	5	/	Euploid	Euploid	101	11	16	0
Euploid_12	BL7	AB	5	/	Euploid	Euploid	137	8	7	0
Euploid_13	BL7	AA	5	/	Euploid	Euploid	148	14	9	0
Euploid_14	BL6	BA	6	BL2	Euploid	Euploid	239	9	18	0
Euploid_15	BL6	AB	6	BL1	Euploid	Euploid	182	6	11	0
Euploid_16	BL7	BA	5	/	Euploid	Euploid	114	8	4	0
Aneuploid_1	BL7	BB	5	/	M18, T1, T20	Aneuploid	73	22	0	0
Aneuploid_2	BL7	BB	6	BL3/BB	T15, M19	Aneuploid	68	3	0	0
Aneuploid_3	BL7	BB	5	/	T16, M21	Aneuploid	63	12	4	0
Aneuploid_4	BL7	BB	5	/	T5, T22	Aneuploid	62	13	7	0
Aneuploid_5	BL7	BB	5	/	M14	Aneuploid	84	15	4	0
Aneuploid_6	BL7	BB	6	BL7/CC	T14, T22	Aneuploid	83	0	0	0
Aneuploid_7	BL7	BB	5	/	T1,T18, Mosaic del 6q16.1-q16.2(5Mb)	Aneuploid	105	16	3	0
Aneuploid_8	BL7	BB	5	/	T13,T15, Moaic del 1 pter-1q34.2 (42Mb)	Aneuploid	118	12	5	0
Aneuploid_9	BL7	BB	5	/	T21, T13	Aneuploid	99	6	0	0
Aneuploid_10	BL7	BB	6	BL3/BB	M16,17,18	Aneuploid	37	2	0	0
Aneuploid_11	BL7	BB	6	BL3/BC	M5, M12, M21 and T7	Aneuploid	117	5	0	0
Aneuploid_12	BL6	BB	5	/	M14, T9	Aneuploid	70	5	2	0
Aneuploid_13	BL7	AB	5	/	T14, T16	Aneuploid	97	18	4	0
Aneuploid_14	BL7	BA	5	/	Triploid, +18	Aneuploid	49	0	0	0
Aneuploid_15	BL7	BA	5	/	T13;T15	Aneuploid	109	11	7	0
Aneuploid_16	BL7	AB	5	/	T9;M22	Aneuploid	155	13	4	0
Aneuploid_17	BL7	CA	5	/	T13;T20	Aneuploid	62	5	4	0
Aneuploid_18	BL7	BA	6	BL1	M15, T18; T19	Aneuploid	83	0	0	1
	STAGING SYSTEM
	Phase-contrast microscopy	UZ Brussels staging system based on Gardner*
	Cavity<50% of the embryo	BL1
	Cavity>50% of the embryo	BL2
	full cavity	BL3
	expanding/expanded	BL4
	hatching	BL5
	fully hatched	BL6
	artifically hatched	BL7
	collapsed	BL8
		*Score of the ICM and TE is evaluated from the BL3 stage on
		BL= blastocyst
