# Supplementary material for: Complex aneuploidy triggers autophagy and p53-mediated apoptosis and impairs the second lineage segregation in human preimplantation embryos
Source: eLife. 2024 Dec 9;12:RP88916. doi: 10.7554/eLife.88916 (PMC11627504; doi:10.7554/eLife.88916)
Supplement: Supplementary file 8. [file elife-88916-supp8.xlsx]

## Sheet: Tabelle1
Supplementary Table 8. Gene dosage classification experiment 4
ID	Diagnosis	Total imbalanced loci	Percent rank within group	Dosage rank within group
Aneuploid_14	Triploid, +18	68789	1	high
Aneuploid_11	M5, M12, M21 and T7	3544	0.92	high
Aneuploid_1	M18, T1, T20	3286	0.85	high
Aneuploid_7	T1,T18, Mosaic del 6q16.1-q16.2(5Mb)	2693	0.77	high
Aneuploid_18	M15, T18; T19	2391	0.71	high
Aneuploid_10	M16,17,18	2563	0.69	high
Aneuploid_2	T15, M19	2301	0.62	high
Aneuploid_13	T14, T16	1664	0.54	high
Aneuploid_12	M14, T9	1622	0.46	low
Aneuploid_4	T5, T22	1511	0.38	low
Aneuploid_16	T9;M22	1364	0.35	low
Aneuploid_8	T13,T15, Moaic del 1 pter-1q34.2 (42Mb)	1480	0.31	low
Aneuploid_17	T13;T20	1362	0.29	low
Aneuploid_6	T14, T22	1252	0.23	low
Aneuploid_3	T16, M21	1220	0.15	low
Aneuploid_15	T13;T15	1198	0.12	low
Aneuploid_9	T21, T13	761	0.08	low
Aneuploid_5	M14	755	0	low
