# Supplementary material for: Complex aneuploidy triggers autophagy and p53-mediated apoptosis and impairs the second lineage segregation in human preimplantation embryos
Source: eLife. 2024 Dec 9;12:RP88916. doi: 10.7554/eLife.88916 (PMC11627504; doi:10.7554/eLife.88916)
Supplement: Supplementary file 9. [file elife-88916-supp9.xlsx]

## Sheet: Tabelle1
Supplementary Table 9. Antibodies and reagents used in this study
Primary antibodies	Host	Company	Catalog#	Dilution
Anti-HSP70 monoclonal antibody (5A5)	Mouse	Invitrogen	MA3-007	1:200
Anti-SQSTM1 / p62 monoclonal antibody	Mouse	Abcam	ab56416	1:100
Recombinant Anti-LC3B monoclonal antibody	Rabbit	Abcam	ab192890	1:838
Anti-Oct-3/4 monoclonal antibody	Mouse	Santa-Cruz	sc-5279	1:200
Anti-Human Phospho-p53 (S15) antibody	Rabbit	R&D	AF1043	1:100
Anti-GATA4 monoclonal antibody	Rat	Invitrogen	14-9980-82	1:400
Anti-DRAM polyclonal antibody	Rabbit	Invitrogen	PA20-335	1:500
Anti-phospho-histone H2A.X (Ser139) monoclonal antibody	Mouse	Sigma-Aldrich	05-636	1:500
Anti-NANOG-polyclonal antibody	Goat	R&D	AF1197	1:200
Reagent	Company	Catalog#	Dilution
CaspGLOW™ Fluorescein Active Caspase-8 Staining Kit	Invitrogen	88-7005-42	1:300
CellEvent™ Caspase-3/7 Green Detection Reagent	Invitrogen	C10423	1:400
Secondary antibodies	Host	Company	Catalog#	Dilution
anti-rabbit IgG (H+L) Highly Cross-Adsorbed, Alexa Fluor 647	Goat	Invitrogen	A-21245	1:200
anti-mouse IgG (H+L) Highly Cross-Adsorbed, Alexa Fluor 594	Donkey	Invitrogen	A-21203	1:200
anti-rat IgG (H+L) Highly Cross-Adsorbed, Alexa Fluor 488	Donkey	Invitrogen	A-21208	1:200
anti-mouse IgG2a (H+L) Highly Cross-Adsorbed, Alexa Fluor 568	Goat	Invitrogen	A-21134	1:200
anti-Goat IgG (H+L) Cross-Adsorbed Secondary Antibody, Alexa Fluor 488	Donkey	Invitrogen	A-11055	1:200
anti Rabbit IgG (H+L) Highly Cross Adsorbed Secondary Antibody, Alexa Fluor 647	Donkey	Invitrogen	A-31573	1:200
